# Supplementary material for: One-pot synthesis of mesoporous interconnected carbon-encapsulated Fe3O4 nanospheres as superior anodes for Li-ion batteries
Source: Royal Society of Chemistry journal article supplement (doi:10.1039/c2ra01241c), 2012-01-01
Supplement: c2ra01241c.pdf [file c2ra01241c.pdf]

## Electronic Supplementary Information (ESI)

### One-pot synthesis of mesoporous interconnected carbon-encapsulated Fe<sub>3</sub>O<sub>4</sub> nanospheres as superior anodes for Li-ion batteries

Jun Liu,<sup>a</sup> Yichun Zhou,<sup>\*a</sup> Fei Liu,<sup>bc</sup> Chunping Liu,<sup>a</sup> Jinbin Wang,<sup>a</sup> Yong Pan<sup>a</sup> and  
Dongfeng Xue<sup>\*bc</sup>

<sup>a</sup>Key Laboratory of Low Dimensional Materials & Application Technology, Ministry of Education, Faculty of Materials, Optoelectronics and Physics, Xiangtan University, 411105, China.

Fax: (+) 86-731-58293586; Tel: (+) 86-731-58298119;

E-mail: zhouyc@xtu.edu.cn

<sup>b</sup>School of Chemical Engineering, Dalian University of Technology, Dalian, 116024, China;

<sup>c</sup>State Key Laboratory of Rare Earth Resource Utilization, Changchun Institute of Applied Chemistry, Chinese Academy of Sciences, Changchun 130022, China.

E-mail: dongfeng@ciac.jl.cn

## **Experimental section**

### **Preparation of mesoporous interconnected Fe<sub>3</sub>O<sub>4</sub>@C nanospheres**

In a typical synthesis process of mesoporous interconnected Fe<sub>3</sub>O<sub>4</sub>@C nanospheres, ferrocene (0.3 g) and hydrogen peroxide (0.5 mL) were dissolved in 20–40 mL acetone, and stirred for about 1 h. After a clear transparent solution was formed, the mixture was then transferred into a 30–50 mL Teflon-lined stainless steel autoclave, which was sealed and maintained at 210 °C for 24 h. The as-synthesized sample was further annealed at 450 °C in a N<sub>2</sub> flow to obtain the final product of Fe<sub>3</sub>O<sub>4</sub>/C nanospheres.

### **Preparation of hierarchical bare Fe<sub>3</sub>O<sub>4</sub> nanospheres**

In a typical synthesis of hierarchical bare Fe<sub>3</sub>O<sub>4</sub> nanospheres, 4 mmol FeCl<sub>3</sub>·6H<sub>2</sub>O, 8 mmol sodium citrate and 12 mmol urea were dissolved in distilled water. Then 0.3 g polyacrylamide was added under continuous stirring until it was dissolved totally. The solution was transferred to a 50 mL Teflon-lined autoclave. The autoclave was then sealed and maintained at 190 °C for 12 h.

### **Characterization**

The collected products were characterized by an X-ray diffractometry (XRD) on a Rigaku-DMax 2400 diffractometer equipped with the graphite monochromatized Cu K $\alpha$  radiation flux at a scanning rate of 0.02°s<sup>-1</sup>. The structure of these mesoporous

interconnected  $\text{Fe}_3\text{O}_4@\text{C}$  nanospheres was investigated by means of Scanning electron microscopy (SEM, JSM-6700F) and transmission electron microscopy (TEM, Philips, TecnaiG2 20). The  $\text{N}_2$  adsorption/desorption isotherm was obtained at 77 K using Beishide Instrument-ST, 3H-2000PS2. The BET surface area was estimated using adsorption data in a relative pressure ranging from 0.05 to 0.3. The thermogravimetric analysis (TGA) was performed from room temperature to 800 °C at a ramp rate of 20 °C/min with an air flow rate of 20 mL/min using Q50 TGA. The electron conductivity was measured by Keithley 4200 Semiconductor Characterization System.

### **Electrochemical measurements**

The electrochemical performances of the as-prepared products were measured by using CR2025 coin cells at 0.01–3.00V with NEWARE-BTS-5V20mA battery test system. For the preparation of the working electrode, a mixture of mesoporous interconnected  $\text{Fe}_3\text{O}_4@\text{C}$  active material, carbon black, and polyvinylidene fluoride (PVDF) in the weight ratio of 80:15:5 was ground in a mortar with *N*-methyl-2-pyrrolidone (NMP) as solvent to make slurry. A Li foil was used as the counter electrode and a solution of 1M  $\text{LiPF}_6$  in ethylene carbonate (EC)/diethyl carbonate (DEC) (1:1 in volume) was used as electrolyte.

**Table R1**

Electrical conductivities of prepared samples

| Sample          | Fe <sub>3</sub> O <sub>4</sub> | Fe <sub>3</sub> O <sub>4</sub> @C |
|-----------------|--------------------------------|-----------------------------------|
| $\sigma$ (S/cm) | $1.15 \times 10^{-2}$          | 2.5                               |

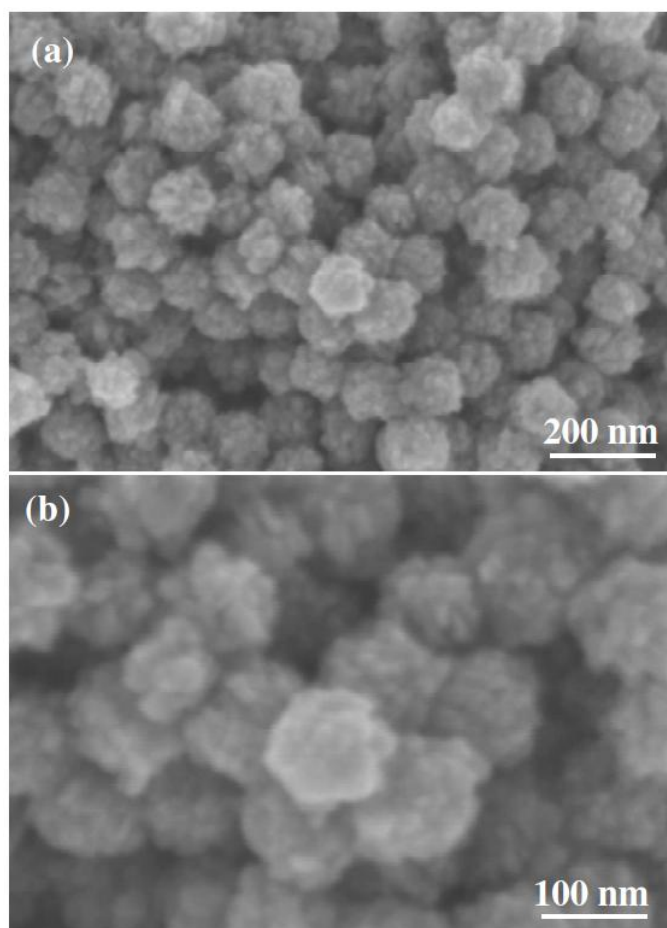

**Fig. S1** SEM images of hierarchical bare Fe<sub>3</sub>O<sub>4</sub> nanospheres.
